# Supplementary material for: Enhancing higher-order modal response in multifrequency atomic force microscopy with a coupled cantilever system
Source: publisher site journal article supplement (doi:10.3762/bjnano.15.57), 2024-06-17
Supplement: Additional file 1 [file 2190-4286-15-57-S1.pdf]

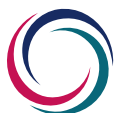

## Supporting Information

for

### **Enhancing higher-order modal response in multifrequency atomic force microscopy with a coupled cantilever system**

Wendong Sun, Jianqiang Qian, Yingzi Li, Yanan Chen, Zhipeng Dou, Rui Lin, Peng Cheng, Xiaodong Gao, Quan Yuan and Yifan Hu

*Beilstein J. Nanotechnol.* **2024**, *15*, 694–703. [doi:10.3762/bjnano.15.57](https://doi.org/10.3762/bjnano.15.57)

### **Simulations of different cantilevers**

**Table S1:** Simulation of the first two orders of modal shapes of microcantilever coupled systems with different cantilever sizes.

| <b>Manufacturer</b>  | <b>Cantilever type</b> | <b>First mode shape</b>                                                              | <b>Second mode shape</b>                                                              |
|----------------------|------------------------|--------------------------------------------------------------------------------------|---------------------------------------------------------------------------------------|
| <b>Olympus</b>       | AC240FS-B2             |    |    |
|                      | RC800PS                |    |    |
| <b>Asylum</b>        | HQ-75-AU               |    |    |
|                      | HQ-150-Au              |    |    |
| <b>BudgetSensors</b> | Tap190-G               |    |    |
|                      | Tap300-G               |    |    |
| <b>Bruker</b>        | MPP-21                 |    |    |
|                      | TESPD                  |  |  |
| <b>NanoWorld</b>     | NW-CDT-NCHR            |  |  |
|                      | NW-S-MFMR              |  |  |
